# Supplementary figures and images for: Hemoglobin A1c in combination with fasting plasma glucose trumps fasting plasma glucose alone as predictive indicators for diabetes mellitus: an ambidirectional cohort study of Thai people with impaired fasting glucose
Source: HighWire-hosted journal article supplement (doi:10.1136/bmjdrc-2021-002427), 2021-11-01

**Supplementary Figure 1.** Log-log plot of combined fasting plasma glucose and HbA1c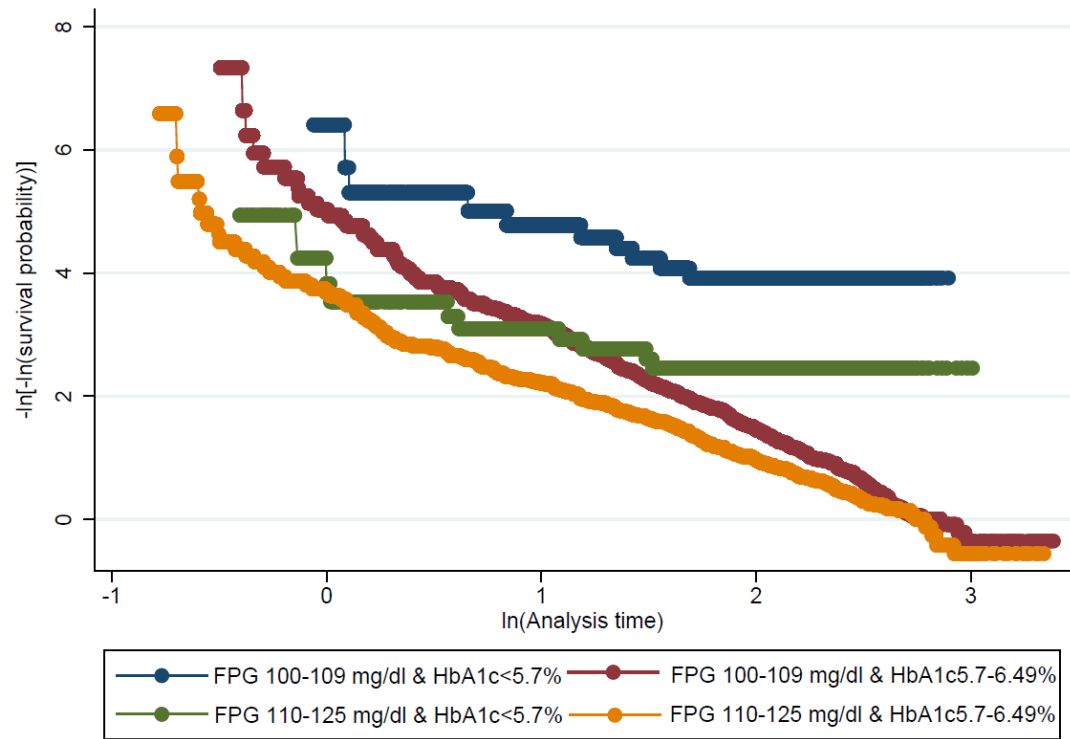

Supplement: bmjdrc-2021-002427supp002_data_supplement.pdf [file bmjdrc-2021-002427supp002_data_supplement.pdf]
